# Supplementary material for: Copper Oxide Nanoparticles Impair Serum Biochemical Indices, Induce Histopathological Effects, and Modulate Transcription of Pro-Inflammatory Cytokines, HSP70, and Oxidative Stress Genes in <em>Oreochromis niloticus</em>
Source: Preprints.org preprint supplement (doi:10.20944/preprints202101.0485.v1), 2021-01-25
Supplement: Supplementary file 3 [file supplementary]

(A)


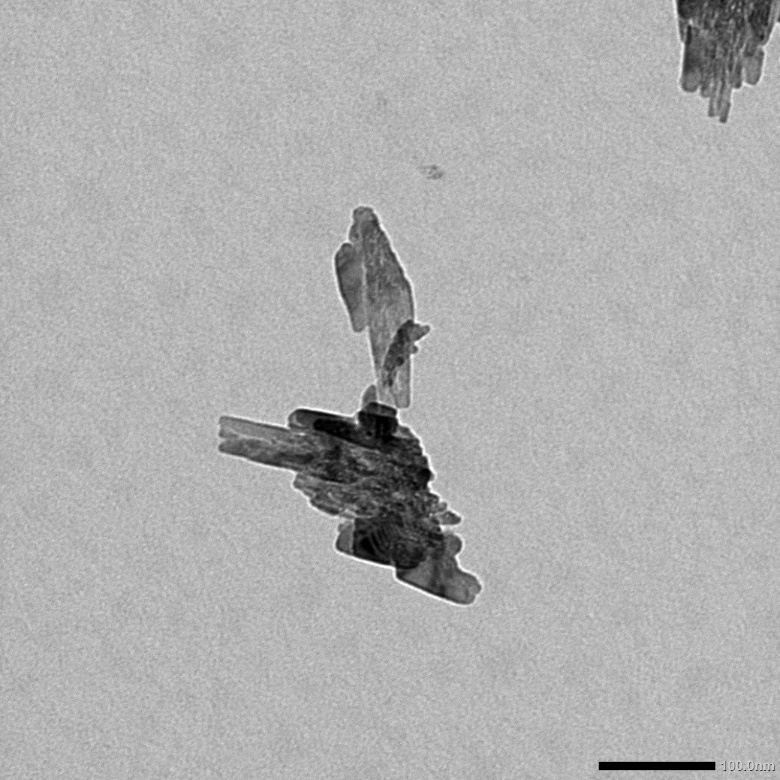

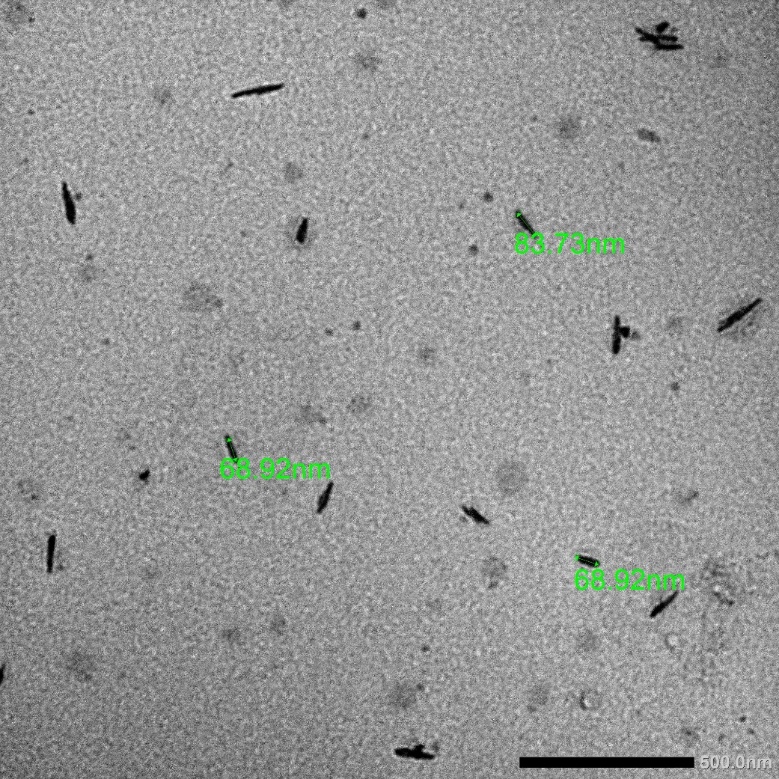


(B)


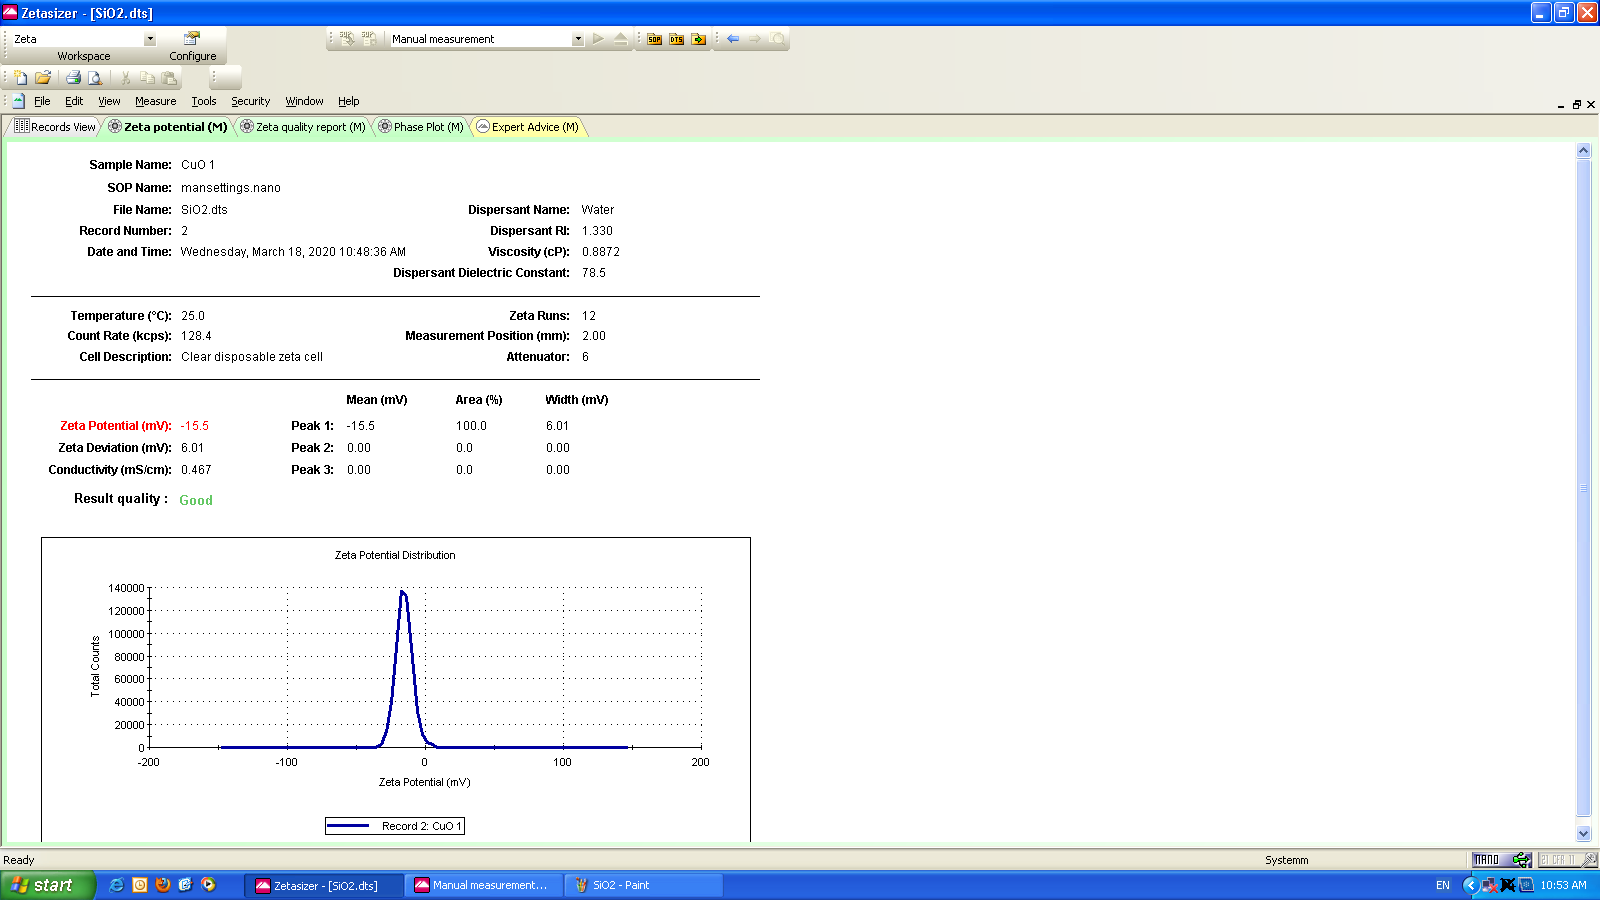


(C)


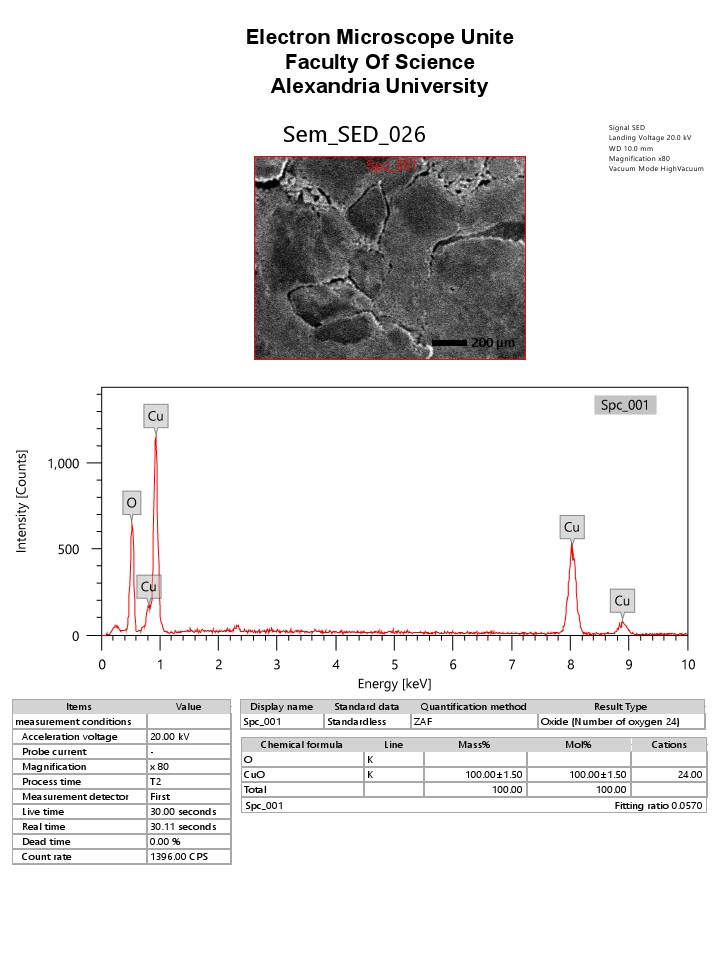


Fig. S1. Characterization of CuONPs used in the present study.

Fig. S1A Transmission electron microscopy (TEM) image of CuONPs nanorods with average size of 68.92 ± 3.49 nm,

Fig. S1B zeta potential of -15.5 mV, and

Fig. S1C the composition analysis by energy-dispersive X-ray spectroscopy (EDX) of the constituents showing the presence of copper and oxygen elements.
